# Supplementary material for: Peroxidases Bound to the Growing Lignin Polymer Produce Natural Like Extracellular Lignin in a Cell Culture of Norway Spruce
Source: PubMed Central journal article supplement (PMC5067304; doi:10.3389/fpls.2016.01523), 2016-10-18
Supplement: Image1.pdf [file Image1.pdf]

## *Supplementary Material*

# Peroxidases bound to the growing lignin polymer produce natural like extracellular lignin in a cell culture of Norway spruce

**Tino Warinowski, Sanna Koutaniemi, Anna Kärkönen, Ilari Sundberg, Merja Toikka, Liisa Kaarina Simola, Ilkka Kilpeläinen and Teemu Heikki Teeri\***

\* **Correspondence:** Corresponding Author: [teemu.teeri@helsinki.fi](mailto:teemu.teeri@helsinki.fi)

|        |     |                                                                 |     |
|--------|-----|-----------------------------------------------------------------|-----|
| PaPx16 | 1   | MAQIKHSPGLTLQFLSVLITGLALMLWIQTVDQAQSCNGLSHHFYKSCPKAQAIKSVVE     | 60  |
| PaPx17 | 1   | MAQIKHSPGLTLQFLSVLITGLALMLWIQTVDQAQSCNGLSHHFYKSCPKAQAIKSVVE     | 60  |
| PaPx18 | 1   | -----MVFIVCS-IHTTANGQLSSTFYAQSCPTALSVVKA AVR                    | 37  |
| CpAPX  | 1   | -----MALLFFLALLFGASYAQLTETFYDQTCPRLPNIVRQEVK                    | 39  |
| PaPx4  | 1   | -----MKTLCIVLVCVLCISS-INNAAHGQLTSTFYNKLCPTALSIVKAAVN            | 46  |
| PaPx5  | 1   | -----MMMRTLVCIGVMAVLLCSININAVNGQLSSTFYAKSCPVRVQSIVKTVVK         | 49  |
|        |     | * : ** : ** : : * .                                             |     |
|        |     |                                                                 |     |
| PaPx16 | 61  | DAVRKEAGMAASLLRLHFHDCFVKGCDGSILLDDTSSFTREKTANPNRNSVRGFGVVDQI    | 120 |
| PaPx17 | 61  | DAVRKEARMAASLLRLHFHDCFVKGCDGSILLDDTSSFTGECTANPNRNSVRGFGVVDQI    | 120 |
| PaPx18 | 38  | QAVANEKRMGASLLRLHFHDCFVNGCDGSVLLDDSSITGECTANPNANSARGFDVIDTI     | 97  |
| CpAPX  | 40  | RAIETDIRAGAKLIRFHFHDCFVQCGDGSVLEDPAGIDSELNGLG-NLGIQGLEIVDAI     | 98  |
| PaPx4  | 47  | KAVNNEKRMGASLLRLHFHDCFVNGCDGSILLDDNSTFTGECTALPNANSVRGFDVIDTI    | 106 |
| PaPx5  | 50  | QAVAKEKRMGASLRLHFHDCFVNGCDGSILLDDNATFTGECTAGPNANSARGFDVIDTI     | 109 |
|        |     | * : . : * . * : * : * : * : * : * : * : * : * : * : * : * : * . |     |
|        |     |                                                                 |     |
| PaPx16 | 121 | KCELEKACPGVVSCADILAVAARDSVGFSGGPFWKVLLGRRDSRSASKSGANNDIPGPNS    | 180 |
| PaPx17 | 121 | KSELEKACPGVVSCADILAVAARDSVGFSGGPFWKVLLGRRDSRSASKSGANNDIPGPNS    | 180 |
| PaPx18 | 98  | KSNVEKACSGVVSCADILAI SARDSVVELGGPSWTVM LGRRDSTTASKNGANNIPPTS    | 157 |
| CpAPX  | 99  | KAAVESECPGVVSCADVLALAAKQSV DVQGGPSWRVLFGRDRSRTANRTGA-DELPSPFE   | 157 |
| PaPx4  | 107 | KTQVEAACSGVVSCADILAI VARDSV VQLGGPTWTVLLGRRDSTTASLSAANNIPSPAS   | 166 |
| PaPx5  | 110 | KTQVEAACSGVVSCADILTIAARDSIVELQGPWTWV MLGRRDSTTASLSAANNIPSPAS    | 169 |
|        |     | * : * * * * * * * : * : * : * * * * * : * . . * : : * * .       |     |
|        |     |                                                                 |     |
| PaPx16 | 181 | THQTLETKFQRQGLNVVDLVALSGAHTIGLARCSSFKARLYNQTVNGKPDPTLDTTYLKH    | 240 |
| PaPx17 | 181 | THQTLETKFQRQGLNVVDLVALSGAHTIGLARCSSFKARLYNQTVNGKSDPTLDTTYLKH    | 240 |
| PaPx18 | 158 | SLSNLI SLFQAQGLSTKEMVALSGGHTIGQARCVNFRAHIYNET-----NIDSTYSTS     | 210 |
| CpAPX  | 158 | TLEPLKQKFEALGLDSTDLVAPSGAHTFGRSR CMFFSGRFSNFNGTGQDPALDPAYRQE    | 217 |
| PaPx4  | 167 | NLSALISSFTAHLSTKDLVALSGGHTIGQARCTTFRARIYNES-----NIDTSFATS       | 219 |
| PaPx5  | 170 | SLSTLITSFQNHGLSTKDLVALSGAHTIGQSRCAFFRTRIYNES-----NINAAFATS      | 222 |
|        |     | . . * * ** . : : * * * * * : * * * : * . : : .                  |     |
|        |     |                                                                 |     |
| PaPx16 | 241 | LRAVCPQTG-TDDNQTTPLDPVTPIRFDINYYDNV VAGKGLLASDEILYSTKGSRTVGLV   | 299 |
| PaPx17 | 241 | LRAVCPQTG-TDDNQTTPLDPVTPIKFDIDYYDNV VAGKGLLASDQILYSTKGSRTVGLV   | 299 |
| PaPx18 | 211 | LQSKCPSTAGSDSNLSPLDYVTPPTAFDNKYYSNLKSKKGLLHSDQQLFNG--GSTDSQV    | 268 |
| CpAPX  | 218 | LERACTDG-----ETRVNFDPTTPTFDKNYYTNLQANRGLLTS DQVLFSTPGADTIEIV    | 272 |
| PaPx4  | 220 | VKSSCPSAG--GDNTLSPLDLATPTTFDKNYYTDLGNRGLLHSDQQLFSG--GSTNSQV     | 275 |
| PaPx5  | 223 | VKPNCPASAG--GDNTLSPLDVVTPPTTFDKNYYSNLKVQKGLLHSDQQLFNG--GSTDSQV  | 278 |
|        |     | : . * . . : * * * * * : : * * * * * : * . . * * .               |     |

Supplementary Material

```

PaPx16  300  ESYSTSTHAFFKQFAASMIKMGNIPLTGSHGEIRKNCRRMN----- 341
PaPx17  300  ESYSTSMHAFFKQFAASMIKMGNIPLTGSHGEIRKNCRRMN----- 341
PaPx18  269  TTYASNQNSFFSDFAAAMVKMGNIKPLTGTSGQIRKNCRKPN----- 310
CpAPX   273  NRLGSREGTFFRQFRVSMIKMGNIPLTPNQGEIRRNCRGVNELGGEAGHDVM 325
PaPx4   276  TTYSANQNTFFTFDFAAAMVKMGNISPLTGTSGQIRKNCRKAN----- 317
PaPx5   279  TTYSTNQNSFFTFDFAAAMVKMGNISPLTGTSGQIRKNCRKAN----- 320
      .:      **: * .:***** ** . *:***:*** *

```

**Supplementary Figure 1.** Sequence alignment of the cloned peroxidase sequences PaPx16 (AM293546.1), PaPx17 (AM293547.1) and PaPx18 (AM293548.1) with spruce peroxidases PaPx4 (AJ809339.1) and PaPx5 (AJ809340.1), and the anionic pectin-binding peroxidase CpAPX (Y17192.1) from zucchini. In the latter, the pectin-binding arginine residues are shown in bold. The sequenced peptides are indicated in colour.
